# Supplementary material
Source: HighWire-hosted journal article supplement (https://erj.ersjournals.com/content/56/5/2001154)
Supplement: inline-supplementary-material-1 [file inline-supplementary-material-1.pdf]

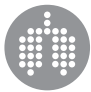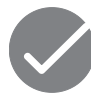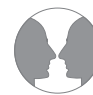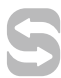

SHAREABLE PDF

# High-flow nasal oxygen: a safe, efficient treatment for COVID-19 patients not in an ICU

Tiphaine Guy<sup>1,7</sup>, Audrey Créac'hcadec<sup>1,7</sup>, Charles Ricordel <sup>2,3</sup>, Alexandre Salé<sup>2</sup>, Baptiste Arnouat<sup>1</sup>, Jean-Louis Bizec<sup>1</sup>, Marie Langelot<sup>1</sup>, Christine Lineau<sup>1</sup>, David Marquette<sup>1</sup>, Françoise Martin<sup>1</sup>, Mathieu Lederlin<sup>4,5</sup> and Stéphane Jouneau <sup>2,6</sup>

**Affiliations:** <sup>1</sup>Dept of Respiratory Medicine, Centre Hospitalier Bretagne Atlantique, Vannes, France. <sup>2</sup>Dept of Respiratory Medicine, Competence Centre for Rare Pulmonary Diseases, CHU Rennes, University of Rennes, Rennes, France. <sup>3</sup>INSERM U1242, Chemistry Oncogenesis Stress and Signalling, CLCC Eugène Marquis, Rennes, France. <sup>4</sup>Dept of Radiology, CHU Rennes, University of Rennes, Rennes, France. <sup>5</sup>LTSI, INSERM U1099, University of Rennes, Rennes, France. <sup>6</sup>University of Rennes, CHU Rennes, INSERM, EHESP, IRSET (Institut de recherche en santé, environnement et travail) – UMR\_S 1085, Rennes, France. <sup>7</sup>Both authors contributed equally.

**Correspondence:** Stéphane Jouneau, University of Rennes, CHU Rennes, INSERM, EHESP, IRSET (Institut de recherche en santé, environnement et travail) – UMR\_S 1085, 2 avenue du Pr Leon Bernard, Rennes 35042, France. E-mail: stephane.jouneau@chu-rennes.fr

 @ERSpublications

**SARS-CoV-2 infected patients with nonhypercapnic acute hypoxaemic respiratory failure can benefit from high-flow nasal oxygen outside an ICU. The technique appears to be safe for healthcare workers and could well liberate critical ICU resources.** <https://bit.ly/2Xq80iu>

**Cite this article as:** Guy T, Créac'hcadec A, Ricordel C, *et al.* High-flow nasal oxygen: a safe, efficient treatment for COVID-19 patients not in an ICU. *Eur Respir J* 2020; 56: 2001154 [<https://doi.org/10.1183/13993003.01154-2020>].

This single-page version can be shared freely online.

*To the Editor:*

The new severe acute respiratory syndrome coronavirus 2 (SARS-CoV-2), causing coronavirus disease 2019 (COVID-19), now recognised by the World Health Organization as a pandemic, emerged in late 2019 in China [1]. Patients infected with SARS-CoV-2 can develop severe pneumonia and respiratory failure, which often require treatment in intensive care units (ICU) in Western European countries [2]. Oxygen therapy and supportive care are still the main forms of therapy for SARS-CoV-2 pneumonia until suitable anti-infective therapies become available.
